# Supplementary material
Source: PubMed Central journal article supplement (PMC6282211)

A.

|          | <i>mtrR</i>                                                     |     |
|----------|-----------------------------------------------------------------|-----|
| FA19     | TTATTTCCGGCGCAGGCAGGGATGGTTTTCCAAGTTGTCCATCATTATCCCGATGATGCG    | 60  |
| GCGS0276 | TTATTTCCGGCGCAGGCAGGGATGGTTTTCCAAGTTGTCCATCATTATCCCGATGATGCG    | 60  |
| CDC2     | TTATTTCCGGCGCAGGCAGGGATGGTTTTCCAAGTTGTCCATCATTATCCCGATGATGCG    | 60  |
| GCGS0402 | TTATTTCCGGCGCAGGCAGGGATGGTTTTCCAAGTTGTCCATCATTATCCCGATGATGCG    | 60  |
| GCGS0834 | TTATTTCCGGCGCAGGCAGGGATGGTTTTCCAAGTTGTCCATCATTATCCCGATGATGCG    | 60  |
|          | *****                                                           |     |
| FA19     | CGGGGCGGTTTTGCCCAAATCGAAACTTTCGCCGGAAGAGAACCAACGCCAAATCAGCCC    | 120 |
| GCGS0276 | CGGGGCGGTTTTGCCCAAATCGAAACTTTCGCCGGAAGAGAACCAACGCCAAATCAGCCC    | 120 |
| CDC2     | TGGGGCAGTTTTGCCCAAATCGAAATTTTCACCGGAAGAGAACCAACGCCAAATCAGCCC    | 120 |
| GCGS0402 | TGGGGCAGTTTTGCCCAAATCGAAATTTTCACCGGAAGAGAACCAACGCCAAATCAGCCC    | 120 |
| GCGS0834 | TGGGGCAGTTTTGCCCAAATCGAAATTTTCACCGGAAGAGAACCAACGCCAAATCAGCCC    | 120 |
|          | *****                                                           |     |
| FA19     | GTCCAACGTCGATTTGATGAAGATGACCGCCGTTTCTTGTCCAAATCGTCAGCCAAATC     | 180 |
| GCGS0276 | GTCCAAGGTTGATTTGATGAAGATAACTGCCGTTTCTTGTCCAAATCGTCAGCCAAATC     | 180 |
| CDC2     | GTCCAAGGTCGACTTGATGAAGATGACCGCCGTTTCTTGTCCAAATCGTCAGCCAAATC     | 180 |
| GCGS0402 | GTCCAAGGTCGACTTGATGAAGATGACCGCCGTTTCTTGTCCAAATCGTCAGCCAAATC     | 180 |
| GCGS0834 | GTCCAAGGTCGACTTGATGAAGATGACCGCCGTTTCTTGTCCAAATCGTCAGCCAAATC     | 180 |
|          | *****                                                           |     |
| FA19     | CTGATTTTTCCACCGCTTCGGTCAAACCGCGGTAATTTTTCTCGCGCCAGATTGCCTGATG   | 240 |
| GCGS0276 | CTGATTTTTCCACCGCTTCGGTCAAACCGCGGTAATTTTTCTCGCGCCAGATTGCCTGATG   | 240 |
| CDC2     | CTGATTTTTCCACCGCTTCGGTCAAACCGCGGTAATTTTTCTCGCGCCAGATTGCCTGATG   | 240 |
| GCGS0402 | CTGATTTTTCCACCGCTTCGGTCAAACCGCGGTAATTTTTCTCGCGCCAGATTGCCTGATG   | 240 |
| GCGS0834 | CTGATTTTTCCACCGCTTCGGTCAAACCGCGGTAATTTTTCTCGCGCCAGATTGCCTGATG   | 240 |
|          | *****                                                           |     |
| FA19     | CTTGCGGGCAATGGCGATAACGGCGGCGTTTTGTTCCGTATGTTTCGCACTTTAAAAACAG   | 300 |
| GCGS0276 | CTTGCGGGCAATGGCGATAACGGCGGCGTTTTGTTCCGTATGTTTCGCACTTTAAAAACAG   | 300 |
| CDC2     | CTTGCGGGCAATGGCGATAACGGCGGCGTTTTGTTCCGTATGTTTCGCACTTTAAAAACAG   | 300 |
| GCGS0402 | CTTGCGGGCAATGGCGATAACGGCGGCGTTTTGTTCCGTATGTTTCGCACTTTAAAAACAG   | 300 |
| GCGS0834 | CTTGCGGGCAATGGCGATAACGGCGGCGTTTTGTTCCGTATGTTTCGCACTTTAAAAACAG   | 300 |
|          | *****                                                           |     |
| FA19     | GATGTTGTGGAATTTGTAGTGGATGTCGTTGCTTTGCAGCCGCTCGAAAAAGTGCAGCAG    | 360 |
| GCGS0276 | GATGTTGTGGAATTTGTAGTGGATGTCGTTGCTTTGCAGCCGCTCGAAAAAGTGCAGCAG    | 360 |
| CDC2     | GATGTTGTGGAATTTGTAGTGGATGTCGTTGCTTTGCAGCCGCTCGAAAAAGTGCAGCAG    | 360 |
| GCGS0402 | GATGTTGTGGAATTTGTAGTGGATGTCGTTGCTTTGCAGCCGCTCGAAAAAGTGCAGCAG    | 360 |
| GCGS0834 | GATGTTGTGGAATTTGTAGTGGATGTCGTTGCTTTGCAGCCGCTCGAAAAAGTGCAGCAG    | 360 |
|          | *****                                                           |     |
|          | D79N                                                            |     |
| FA19     | CGTGTGGCGGAATACCGTCCAAGAACCTCCTTCGGCATCTGCGGCATCTTGC GCGATGCA   | 420 |
| GCGS0276 | CGTGTGGCGGAATACCGCCCAAGACCCTCCTTCGGCATCTTGC GCGATCTTGC GCGATGCA | 420 |
| CDC2     | CGTGTGGCGGAATACCGTCCAAGAACCTCCTTCGGCATCTTGC GCGATCTTGC GCGATGCA | 420 |
| GCGS0402 | CGTGTGGCGGAATACCGTCCAAGAACCTCCTTCGGCATCTTGC GCGATCTTGC GCGATGCA | 420 |
| GCGS0834 | CGTGTGGCGGAATACCGTCCAAGAACCTCCTTCGGCATCTTGC GCGATCTTGC GCGATGCA | 420 |
|          | *****                                                           |     |
| FA19     | GTTTTTCGATGTCGTGCGAGATACGTTGGAACAACGCGTCAACAAGTCTTCCTTATTTTT    | 480 |
| GCGS0276 | GTTTTTCGATGTCGTGCGAGATACGTTGGAACAACGCGTCAACAAGTCTTCCTTATTTTT    | 480 |
| CDC2     | GTTTTTCGATGTCGTGCGAGATACGTTGGAACAACGCGTCAACAAGTCTTCCTTATTTTT    | 480 |
| GCGS0402 | GTTTTTCGATGTCGTGCGAGATACGTTGGAACAACGCGTCAACAAGTCTTCCTTATTTTT    | 480 |
| GCGS0834 | GTTTTTCGATGTCGTGCGAGATACGTTGGAACAACGCGTCAACAAGTCTTCCTTATTTTT    | 480 |
|          | *****                                                           |     |
| FA19     | GAAATGCCAATAGAGCGCGCCGCGGTTACGCCGGCGGCTTGGGCGATTTTCGTTGAGCGA    | 540 |
| GCGS0276 | GAAATGCCAATAGAGCGCGCCGCGGTTACGCCGGCGGCTTGGGCGATTTTCGTTGAGCGA    | 540 |
| CDC2     | AAAATGCCAATAGAGCGCGCCGCGGTTACGCCGGCGGCTTGGGCGATTTTCGTTGAGCGA    | 540 |
| GCGS0402 | AAAATGCCAATAGAGCGCGCCGCGGTTACGCCGGCGGCTTGGGCGATTTTCGTTGAGCGA    | 540 |
| GCGS0834 | GAAATGCCAATAGAGCGCGCCGCGGTTATGCCGGCGGCTTGGGCGATTTTCGTTGAGCGA    | 540 |
|          | *****                                                           |     |



|          |                                                                |      |
|----------|----------------------------------------------------------------|------|
| FA19     | CTGCCGCCGTTGCATTGGCACTGTGCTCTTGCGGTAAAGGCCGAGACGCGGCGCAGGGCG   | 986  |
| GCGS0276 | CTGCCGCCGTTGCATTGGTACTGTGCTCTTGCGGTAAAGGCCGAGACGCGGCGCAGGGCG   | 1139 |
| CDC2     | CTGCCTCTGTGCGGTTGGCACTGTATCTTGCGGCAAAGCAGATGAAGCGGCACAGGGCG    | 983  |
| GCGS0402 | CTGCCTCTGTGCGGTTGGCACTGTATCTTGCGGCAAAGCAGATGAAGCGGCACAGGGCG    | 983  |
| GCGS0834 | CTGCCTCTGTGCGGTTGGCACTGTATCTTGCGGCAAAGCAGATGAAGCGGCACAGGGCG    | 985  |
|          | ***** * ** * * ***** ***** * * * * * ***** *****               |      |
| FA19     | GGCAGCCTGCGGGTCGGGAAGCCCCGCGCCGTCGTCGCGCTCGTAACCGTCCATCCGC     | 1046 |
| GCGS0276 | GGCAGCCTGCGGGTCGGGAAGCACCGGCTCCCGTCGTCGCGTTCGTAACCGTCCATCCGC   | 1199 |
| CDC2     | GGCAGCCTGCGTGGTCGGGAAGCTCCGGCTCCCGTCGTCGCGCTGTTACCGTCCATCCGC   | 1043 |
| GCGS0402 | GGCAGCCTGCGTGGTCGGGAAGCTCCGGCTCCCGTCGTCGCGTTCGTTACCGTCCATCCGC  | 1043 |
| GCGS0834 | GGCAGCCTGCGGGTCGGGAAGCACCGGCTCCCGTCGTCGCGTTCGTAACCGTCCATCCGC   | 1045 |
|          | ***** ***** ** * * ***** * * * * ***** *****                   |      |
| FA19     | AAACCGTCGCATTGACCGTCGAGTTGCCGGGCGTTTGGAAATCGCTGCGTACCGCCGATG   | 1106 |
| GCGS0276 | AAACCGTCGCATTGACCGTCGAGTTGCCGGGCGTTTGGAAATCGCTGCGTACCGCCGATG   | 1259 |
| CDC2     | AAACCGTTGCGTTGACCGTCGAGTTGCCGGGACGTTTGGAAATCGCTGCGTACCGCCGATG  | 1103 |
| GCGS0402 | AAACCGTTGCGTTGACCGTCGAGTTGCCGGGACGTTTGGAAATCGCTGCGTACCGCCGATG  | 1103 |
| GCGS0834 | AAACCGTTGCGTTGACTGTCGAGTTGCCGGGCGTTTGGAAATCGCTGCGTACCGCCGATG   | 1105 |
|          | ***** * * ***** ***** ***** ***** *****                        |      |
| FA19     | TCCGCGCCCAAGTCGGCGGCATCATCAAAAACGCCTGTTCCAAGAAGGCAGTTATGTCC    | 1166 |
| GCGS0276 | TCCGCGCCCAAGTCGGCGGCATCATCAAAAACGCCTGTTCCAAGAAGGCAGTTATGTCC    | 1319 |
| CDC2     | TCCGTGCGCAAGTTGGCGGCATTTATCAAAAACGCCTGTTCCAAGAAGGCAGTTATGTCC   | 1163 |
| GCGS0402 | TCCGTGCGCAAGTTGGCGGCATTTATCAAAAACGCCTGTTCCAAGAAGGCAGTTATGTCC   | 1163 |
| GCGS0834 | TCCGTGCGCAAGTTGGCGGCATCATTCAAAAACGCCTGTTCCAAGAAGGCAGTTATGTCC   | 1165 |
|          | *** * ***** ***** * ***** ***** ***** *****                    |      |
| FA19     | GCGCCGGGACAGCCGCTGTATCAGATCGACAGTTCCTACTTATGAAGCAGGTCTGGAAAGCG | 1226 |
| GCGS0276 | GTGCCGGACAGCCGCTGTATCAGATCGACAGTTCCTACTTATGAAGCAGGTCTGGAAAGCG  | 1379 |
| CDC2     | GTGCCGGACAGCCGCTGTATCAGATCGACAGTTCCTACTTATGAAGCAAGTCTGGAAAGCG  | 1223 |
| GCGS0402 | GTGCCGGACAGCCGCTGTATCAGATCGACAGTTCCTACTTATGAAGCAAGTCTGGAAAGCG  | 1223 |
| GCGS0834 | GTGCCGGACAGCCGCTGTATCAGATTGACAGTTCCTACTTATGAAGCAGGTCTGGAAAGCG  | 1225 |
|          | * ***** ***** ***** ***** ***** ***** *****                    |      |
| FA19     | CGCGCGCGCAACTGGCAACGGCACAGGCAACGCTTGCCAAAGCGGATGCGGATTTGGCGC   | 1286 |
| GCGS0276 | CGCGCGCGCAACTGGCAACGGCTCAGGCAACGCTTGCCAAAGCGGATGCGGATTTGGCGC   | 1439 |
| CDC2     | CGCGCGCGCAACTGGCAACGGCACAGGCAACGCTTGCCAAAGCGGATGCGGATTTGGCGC   | 1283 |
| GCGS0402 | CGCGCGCGCAACTGGCAACGGCACAGGCAACGCTTGCCAAAGCGGATGCGGATTTGGCGC   | 1283 |
| GCGS0834 | CGCGTGCAGCAACTGGCAACGGCACAGGCAACGCTTGCCAAAGCGGATGCGGATTTGGCGC  | 1285 |
|          | *** ***** ***** ***** ***** ***** ***** *****                  |      |
| FA19     | GTTACAAACCGCTGGTTTCCGCGGATGCCATCAGTAAACAAGAGTACGATGCTGCGGTAA   | 1346 |
| GCGS0276 | GATACAAGCCTTTGGTTGCCGCGAAGCCGTCAGCCGGCAGGAATACGATGCTGCGGTAA    | 1499 |
| CDC2     | GTTACAAACCGCTGGTTGCCGCGGATGCCATCAGTAAACAAGAGTACGATGCGGCGGTAA   | 1343 |
| GCGS0402 | GTTACAAACCGCTGGTTGCCGCGGATGCCATCAGTAAACAAGAGTACGATGCGGCGGTAA   | 1343 |
| GCGS0834 | GTTACAAACCGCTGGTTTCCGCGGATGCCATCAGTAAACAAGAGTACGATGCTGCGGTAA   | 1345 |
|          | * ***** * * ***** ***** * * * * * * * * * ***** *****          |      |
| FA19     | CGGCGAAACGTTCTGCCGAAGCAAGCGTTAAAGCGGCGCAGGCGGCGATCAAATCCGCCG   | 1406 |
| GCGS0276 | CGGCGAAACGTTCTGCCGAGGCAGGTGTTAAAGCAGCACAGGCGGCAATCAAATCTGCCG   | 1559 |
| CDC2     | CGGCGAAACGTTCTGCCGAAGCAGGCGTTAAAGCGGCGCAGGCGGCGATCAAATCTGCCG   | 1403 |
| GCGS0402 | CGGCGAAACGTTCTGCCGAAGCAGGCGTTAAAGCGGCGCAGGCGGCGATCAAATCTGCCG   | 1403 |
| GCGS0834 | CGGCGAAACGTTCTGCCGAGGCAGGCGTTAAAGCGGCGCAAGCGGCGATCAAATCCGCCG   | 1405 |
|          | ***** ***** * * * * * ***** * * * * * ***** *****              |      |
| FA19     | GCATCAATCTGAACCGTTTCGCGCATTACCGCGCGATTTCGGGCTTTATCGGTCAGTCCA   | 1466 |
| GCGS0276 | GCATTAATCTGAACCGTTTCGCGCATTACCGCGCGATTTCGGGCTTTATCGGTCAGTCCA   | 1619 |
| CDC2     | GCATCAGCCTGAACCGTTTCGCGCATTACCGCGCGATTTCGGGCTTTATCGGCCAGTCCA   | 1463 |
| GCGS0402 | GCATCAGCCTGAACCGTTTCGCGCATTACCGCGCGATTTCGGGCTTTATCGGCCAGTCCA   | 1463 |
| GCGS0834 | GCATCAGCCTGAACCGTTTCGCGCATTACCGCGCGATTTCGGGCTTTATCGGCCAGTCCA   | 1465 |
|          | *** * ***** ***** ***** ***** ***** *****                      |      |

|          |                                                                |      |
|----------|----------------------------------------------------------------|------|
| FA19     | AAGTTTCCGAAGGTACGCTGTTGAATGCGGGCGATACAACCTGTTT TAGCCACCATCCGCC | 1526 |
| GCGS0276 | AAGTTTCCGAAGGTACGCTGTTGAATGCGGGCGATACGACCGTGCTGGCAACCATCCGCC   | 1679 |
| CDC2     | AAGTTTCCGAAGGTACGCTGTTGAATGCGGGCGATACAACCTGTTT TAGCCACCATCCGCC | 1523 |
| GCGS0402 | AAGTTTCCGAAGGTACGCTGTTGAATGCGGGCGATACAACCTGTTT TAGCCACCATCCGCC | 1523 |
| GCGS0834 | AAGTTTCCGAAGGTACGTTGCTGAACGCTGGCGATGCGACCGTACTGGCGACCATCCGCC   | 1525 |
|          | ***** ** * ** * ** * ** * ** * ** * ** * ** *                  |      |
| FA19     | AAACCAATCCGATGTATGTGAACGTTACCCAGTCTGCATCCGAAGTGATGAAACTGCGCC   | 1586 |
| GCGS0276 | AAACCAATCCGATGTATGTGAACGTTACCCAGTCTGCATCCGAAGTGATGAAACTGCGCC   | 1739 |
| CDC2     | AAACCAATCCGATGTATGTGAACGTTACCCAGTCTGCATCCGAAGTGATGAAACTGCGCC   | 1583 |
| GCGS0402 | AAACCAATCCGATGTATGTGAACGTTACCCAGTCTGCATCCGAAGTGATGAAACTGCGCC   | 1583 |
| GCGS0834 | AAACCAATCCGATGTATGTGAACGTTACCCAGTCTGCATCCGAAGTGATGAAACTGCGCC   | 1585 |
|          | *****                                                          |      |
| FA19     | GGCAGATAGCCGAAGGCAAGCTGCTGGCGGCGGATGGTGCATGCGGTGCGCATCAAAT     | 1646 |
| GCGS0276 | GGCAGATAGCCGAAGGCAAACTGCTGGCGGCGGATGGTGTGATGCGGTGCGCATCAAAT    | 1799 |
| CDC2     | GTCAGATAGCCGAGGGCAAGCTGCTGGCGGCGGATGGTGTGATGCGGTGCGCATCAAAT    | 1643 |
| GCGS0402 | GTCAGATAGCCGAGGGCAAGCTGCTGGCGGCGGATGGTGTGATGCGGTGCGCATCAAAT    | 1643 |
| GCGS0834 | GGCAGATAGCCGAAGGCAAGCTGCTGGCGGCGAGCGGTGCGGTAGCGGTGCGCATCAAGT   | 1645 |
|          | * ***** * ** * ** * ** * ** * ** * ** * ** *                   |      |
| FA19     | TTGACGACGGTACGGTTTATCCTGAAAAAGGCCGCTGCTGTTTGTGATCCGACCGTTG     | 1706 |
| GCGS0276 | TTGACGACGGCACGGTTTATCCTGAAAAAGGCCGCTGCTGTTTGTGATCCGACCGTTG     | 1859 |
| CDC2     | TTGACGACGGCACGGTTTATCCTGAAAAAGGCCGCTGCTGTTTGTGATCCGACCGTTG     | 1703 |
| GCGS0402 | TTGACGACGGCACGGTTTATCCTGAAAAAGGCCGCTGCTGTTTGTGATCCGACCGTTG     | 1703 |
| GCGS0834 | TTGACGACGGCACGGTTTATCCTGAAAAAGGCCGCTGCTGTTTGTGATCCGACCGTTG     | 1705 |
|          | ***** ***** ** *                                               |      |
| FA19     | ACGAATCGACCGGTGATGTTACCTGCGCGCCGCGTACCGAACGATCAGAATATCCTGA     | 1766 |
| GCGS0276 | ACGAATCGACCGGTGATGTTACCTGCGCGCCGCGTACCGAACGATCAGAATATCCTGA     | 1919 |
| CDC2     | ACGAATCGACCGGTGATGTTACCTGCGCGCCGCGTACCGAACGATCAGAATATCCTGA     | 1763 |
| GCGS0402 | ACGAATCGACCGGTGATGTTACCTGCGCGCCGCGTACCGAACGATCAGAATATCCTGA     | 1763 |
| GCGS0834 | ACGAATCGACCGGTGATGTTACCTGCGCGCCGCGTACCGAACATCAGAATATCCTGA      | 1765 |
|          | ***** ***** ** *                                               |      |
| FA19     | TGCCCGGCTGTATGTGCGGTGCTGATGGATCAGGTGGCGGCGGATAATGCATTTCATCG    | 1826 |
| GCGS0276 | TGCCCGGCTGTATGTGCGGTGCTGATGGATCAAGTGGCGGTGGATAACGCATTTCATCG    | 1979 |
| CDC2     | TGCCCGGCTGTATGTGCGGTGCTGATGGATCAAGTGGCGGTGGATAATGCATTTCATCG    | 1823 |
| GCGS0402 | TGCCCGGCTGTATGTGCGGTGCTGATGGATCAAGTGGCGGTGGATAATGCATTTCATCG    | 1823 |
| GCGS0834 | TGGCAGGCTGTATGTGCGGTGCTGATGGATCAAGTGGCGGCGGACAACGCATTTCATCG    | 1825 |
|          | ** * ***** ***** ** * ** * ** * ** *                           |      |
| FA19     | TTCCACAGCAGGCGGTAACGCGCGGTGCGAAAGATAACCGTGATGATTGTGAATGCCCAAG  | 1886 |
| GCGS0276 | TGCCGACGAGGCGGTAACGCGCGGTGCGAAAGATAACCGTGATGATTGTGAATGCCCAAG   | 2039 |
| CDC2     | TTCCACAGCAGGCGGTAACGCGCGGTACGAAAGATAACCGTGATGATTGTGAACGCCCAAG  | 1883 |
| GCGS0402 | TTCCACAGCAGGCGGTAACGCGCGGTACGAAAGATAACCGTGATGATTGTGAACGCCCAAG  | 1883 |
| GCGS0834 | TGCCGACGAGGCGGTAACGCGCGGTGCGAAAGATAACCGTGATGATTGTGAACGCCCAAG   | 1885 |
|          | * ** ***** ***** ** *                                          |      |
| FA19     | GCGGTATGGAACCCGCGAGGTAACGCTGCGCAACAGCAGGGTACGAATTGGATTGTTA     | 1946 |
| GCGS0276 | GCGGTATGGAACCCGCGAGGTAACGCTGCGCAACAGCAGGGTACGAATTGGATTGTTA     | 2099 |
| CDC2     | GCGGTATGGAACCCGCGAGGTAACGATTGCACAACAGCAGGGTACGAATTGGATTGTTA    | 1943 |
| GCGS0402 | GCGGTATGGAACCCGCGAGGTAACGATTGCACAACAGCAGGGTACGAATTGGATTGTTA    | 1943 |
| GCGS0834 | GCGGTATGGAACCCGCGAGGTAACGCTGCGCAACAGCAGGGTACGAATTGGATTGTTA     | 1945 |
|          | ***** ** * ** * ** * ** * ** * ** *                            |      |
| FA19     | CGTCGGTCTGAAGGACGGGACAAGGTGGTTGTGGAAGGCATCAGTATCGCCGGTATGA     | 2006 |
| GCGS0276 | CGTCGGTCTGAAGGACGGGACAAGGTGGTTGTGGAAGGCATCAGTATCGCCGGTATGA     | 2159 |
| CDC2     | CGTCAGGTCTGAAGGACGGGACAAGGTGGTTGTGGAAGGCATCAGTATCGCCGGTATGA    | 2003 |
| GCGS0402 | CGTCAGGTCTGAAGGACGGGACAAGGTGGTTGTGGAAGGCATCAGTATCGCCGGTATGA    | 2003 |
| GCGS0834 | CGTCAGGTCTGAAGGACGGGACAAGGTGGTTGTGGAAGGCATCAGTATCGCCGGTATGA    | 2005 |
|          | **** ***** ***** ** *                                          |      |

|          |                                                               |      |
|----------|---------------------------------------------------------------|------|
| FA19     | CGGGGGCGAAAAAGGTAACGCCCAAAGAATGGGCGCCGTCTGAAAACCAAGCTGCCGCC   | 2066 |
| GCGS0276 | CGGGTGCGAAAAAGGTAACGCCCAAAGAATGGGCGCCGTCTGAAAACCAAGCCGCCGCGC  | 2219 |
| CDC2     | CGGGTGCGAAAAAGGTAACGCCCAAAGAATGGATGCCGTCTGAAAACCAAGCTGCTGCCG  | 2063 |
| GCGS0402 | CGGGTGCGAAAAAGGTAACGCCCAAAGAATGGATGCCGTCTGAAAACCAAGCTGCTGCCG  | 2063 |
| GCGS0834 | CGGGTGCGAAAAAGGTAACGCCCAAAGAATGGATGCCGTCTGAAAACCAAGCCTCTGCC   | 2065 |
|          | **** * * * * *                                                |      |
| FA19     | CTCAAGCCGGCGTTTCCAGACGGCATCTGAAGCCAAACCTGCTTCTGAAGCGAATAAGGAA | 2126 |
| GCGS0276 | CTCAAGCTGACGTTTCCAGACGGCATCTGAAGCCAAACCTGCTTCTGAAGCGAATAAGGAA | 2279 |
| CDC2     | CTCAATCCGGCGTTTCCAGACGGCATCTGAAGCCAAACCTGCTTCTGAAGCGAATAAGGAA | 2123 |
| GCGS0402 | CTCAATCCGGCGTTTCCAGACGGCATCTGAAGCCAAACCTGCTTCTGAAGCGAATAAGGAA | 2123 |
| GCGS0834 | CTCAAGCCGGCGTTTCCAGACGGCATCTGAAGCCAAACCTGCTTCTGAAGCGAATAAGGAA | 2125 |
|          | **** * * * * *                                                |      |
|          | <i>mtxD</i>                                                   |      |
| FA19     | GGCATCGATGGCTAAATTTTATCGACCGCCCATTTTCGCGTGGGTTATTTTCGATTTT    | 2186 |
| GCGS0276 | GGCATCGATGGCTAAATTTTATCGACCGCCCATTTTCGCGTGGGTTATTTTCGATTTT    | 2339 |
| CDC2     | GGCATCGATGGCTAAATTTTATCGACCGCCCATTTTCGCGTGGGTTATTTTCGATTTT    | 2183 |
| GCGS0402 | GGCATCGATGGCTAAATTTTATCGACCGCCCATTTTCGCGTGGGTTATTTTCGATTTT    | 2183 |
| GCGS0834 | GGCATCGATGGCTAAATTTTATCGACCGCCCATTTTCGCGTGGGTTATTTTCGATTTT    | 2185 |
|          | **** * * * * *                                                |      |
| FA19     | CATTATTGCGGCAGGTATTTTCGGCATTAAAGCCTGCCGGTTTCGCAATATCCGTCCGT   | 2246 |
| GCGS0276 | CATTATTGCGGCAGGTATTTTCGGCATTAAAGCCTGCCGGTTTCGCAATATCCGTCCGT   | 2399 |
| CDC2     | CATCATTGCGGCAGGTATTTTCGGCATTAAAGCCTGCCGGTTTCGCAATATCCGTCTGT   | 2243 |
| GCGS0402 | CATCATTGCGGCAGGTATTTTCGGCATTAAAGCCTGCCGGTTTCGCAATATCCGTCTGT   | 2243 |
| GCGS0834 | CATTATTGCGGCAGGTATTTTCGGCATTAAAGCCTGCCGGTTTCGCAATATCCGTCTGT   | 2245 |
|          | ** * * * * *                                                  |      |
| FA19     | TGCCGCCCCGACCATTACTTTGCACGCCATTATCCGGGTGCGTCCGCACAAGTGATGGA   | 2306 |
| GCGS0276 | TGCCGCCCCGACCATTACTTTGCACGCCATTATCCGGGTGCGTCCGCACAAGTGATGGA   | 2459 |
| CDC2     | TGCCGCACCGAATATTACCCTGAGGGCTACTTATCCGGGTGCGTCCGCACAAGTGATGGA  | 2303 |
| GCGS0402 | TGCCGCACCGAATATTACCCTGAGGGCTACTTATCCGGGTGCGTCCGCACAAGTGATGGA  | 2303 |
| GCGS0834 | TGCCGCCCCAACCATTACTTTGCACGCCATTATCCGGGTGCGTCCGCACAAGTGATGGA   | 2305 |
|          | **** * * * * *                                                |      |
| FA19     | AGGCAGCGTACTTTCCGTGATCGAACGGAATATGAACGGCGTGGAAGGTTTGGACTATAT  | 2366 |
| GCGS0276 | AGGCAGCGTACTTTCCGTGATCGAACGGAATATGAACGGCGTGGAAGGTTTGGACTATAT  | 2519 |
| CDC2     | AGGCAGCGTACTTTCCGTGATCGAACGGAATATGAACGGCGTGGAAGGTTTGGACTATAT  | 2363 |
| GCGS0402 | AGGCAGCGTACTTTCCGTGATCGAACGGAATATGAACGGCGTGGAAGGTTTGGACTATAT  | 2363 |
| GCGS0834 | AGGCAGCGTACTTTCCGTGATCGAACGGAATATGAACGGCGTGGAAGGTTTGGACTATAT  | 2365 |
|          | ** * * * * *                                                  |      |
| FA19     | GTCCACTTCCGCGGATTCGAGCGGCAGCGGCAGCGTGAGCCTTACGCCCGATAC        | 2426 |
| GCGS0276 | GTCCACTTCCGCGGATTCGAGCGGCAGCGGCAGCGTGAGCCTTACGCCCGATAC        | 2579 |
| CDC2     | GTCCACTTCTGCCGATTCGAGCGGCAGCGGCAGCGTGAGCCTTACGCCCGATAC        | 2423 |
| GCGS0402 | GTCCACTTCTGCCGATTCGAGCGGCAGCGGCAGCGTGAGCCTTACGCCCGATAC        | 2423 |
| GCGS0834 | GTCCACTTCTGCCGATTCGAGCGGCAGCGGCAGCGTGAGCCTTACGCCCGATAC        | 2425 |
|          | **** * * * * *                                                |      |
| FA19     | CGACGAGAATCTGGCGCAGGTGGAAGTGCAGAACAAAGCTTCCGAAGTATTGAGCAGCT   | 2486 |
| GCGS0276 | CGACGAGAATCTGGCGCAGGTGGAAGTGCAGAACAAAGCTTCCGAAGTATTGAGCAGCT   | 2639 |
| CDC2     | CGACGAAGATTTGGCTCAGGTGGAGGTGCAAAACAAGCTTCCGAAGTATTGAGCATGTT   | 2483 |
| GCGS0402 | CGACGAAGATTTGGCTCAGGTGGAGGTGCAAAACAAGCTTCCGAAGTATTGAGCATGTT   | 2483 |
| GCGS0834 | GGACGAGAACCTGGCGCAGGTGGAAGTGCAGAACAAAGCTTCCGAAGTATTGAGCAGCT   | 2485 |
|          | **** * * * * *                                                |      |
| FA19     | GCCGGCAACCGTCCAGCAATACGGCGTAACCGTATCCAAGGCGGTTCCAATTTTCTGAT   | 2546 |
| GCGS0276 | GCCGGCAACCGTCCAGCAATACGGCGTAACCGTATCCAAGGCGGTTCCAATTTTCTGAT   | 2699 |
| CDC2     | GCCTGCTACCGTCCAGCAATACGGCGTTACCGTATCCAAGGCGGTTCCAATTTTTTCTGAT | 2543 |
| GCGS0402 | GCCTGCTACCGTCCAGCAATACGGCGTTACCGTATCCAAGGCGGTTCCAATTTTTTCTGAT | 2543 |
| GCGS0834 | GCCGGCAACCGTCCAGCAGTACGGCGTTACCGTATCCAAGGCGGTTCCAATTTTCTGAT   | 2545 |
|          | ** * * * * *                                                  |      |

|          |                                                                       |      |
|----------|-----------------------------------------------------------------------|------|
| FA19     | <b>GATTGTGATGCTTTCGTCCGGATGTGCAGTCAACCGAAGAGATGAACGACTACGCGCAGCG</b>  | 2606 |
| GCGS0276 | GATTGTGATGCTTTCGTCCGGATGTGCAGTCAACCGAAGAGATGAACGACTACGCGCAGCG         | 2759 |
| CDC2     | GATTGTGATGCTGTTCGTCCGGATGTGCAGTCAACCGAAGAGATGAACGACTACGCGCAGCG        | 2603 |
| GCGS0402 | GATTGTGATGCTGTTCGTCCGGATGTGCAGTCAACCGAAGAGATGAACGACTACGCGCAGCG        | 2603 |
| GCGS0834 | GATTGTGATGCTTTCGTCCGGATGTGCAGTCAACCGAAGAGATGAACGACTACGCGCAGCG         | 2605 |
|          | ***** ** ** *****                                                     |      |
| FA19     | <b>CAACGTCGTTCCCGAATTGCAGCGTATCGAAGGCGTGGGGCAGGTCCGCCTGTTCCGGCGC</b>  | 2666 |
| GCGS0276 | TAATATCGTTCCCGAAGTGCAGCGTATCGAAGGCGTGGGGCAGGTACGCCTGTTCCGGCGC         | 2819 |
| CDC2     | TAATATCGTTCCCGAGTTGCAGCGTATCGAAGGCGTGGGGCAGGTACGCCTGTTCCGGCGC         | 2663 |
| GCGS0402 | TAATATCGTTCCCGAGTTGCAGCGTATCGAAGGCGTGGGGCAGGTACGCCTGTTCCGGCGC         | 2663 |
| GCGS0834 | CAATATCGTTCCCGAATTGCAGCGTATCGAAGGCGTGGGGCAGGTCCGCCTGTTCCGGCGC         | 2665 |
|          | ** *****                                                              |      |
| FA19     | <b>GCAACGCGCGATGCGGATTTGGGTCGATCCTAAGAACTGCAAACTACAATTTGTCGTT</b>     | 2726 |
| GCGS0276 | GCAACGCGCGATGCGGATTTGGGTCGATCCTAAGAACTGCAAACTACAATTTGTCGTT            | 2879 |
| CDC2     | GCAACGCGCGATGCGGATTTGGGTCGATCCTAAGAACTGCAAACTACAATTTGTCGTT            | 2723 |
| GCGS0402 | GCAACGCGCGATGCGGATTTGGGTCGATCCTAAGAACTGCAAACTACAATTTGTCGTT            | 2723 |
| GCGS0834 | GCAACGCGCGATGCGGATTTGGGTCGATCCTAAGAACTGCAAACTACAATTTGTCGTT            | 2725 |
|          | *****                                                                 |      |
| FA19     | <b>TGCCGATGTCGGCAGCGCGTTGTCGGCGCAGAATATCCAAATTTCCGCAGGTTCCATCGG</b>   | 2786 |
| GCGS0276 | TGCCGATATCGGCAGCGCGTGTTCGGCCAGAAGTCCAGATTTCCGCAGGTTCCATCGG            | 2939 |
| CDC2     | TGCCGATATCGGCAGCGCGTGTTCGGCGCAGAATATCCAGATTTCCGCAGGTTCCATCGG          | 2783 |
| GCGS0402 | TGCCGATATCGGCAGCGCGTGTTCGGCGCAGAATATCCAGATTTCCGCAGGTTCCATCGG          | 2783 |
| GCGS0834 | TGCCGATATCGGCAGCGCGTGTTCGGCCAGAAGTCCAGATTTCCGCAGGTTCCATCGG            | 2785 |
|          | ***** ** ** *****                                                     |      |
| FA19     | <b>TTTCGCTTCCCGCTGTTCGGCGGACAGACGGTTACGGCTACCGTAACGGCGCAAGGGCAGTT</b> | 2846 |
| GCGS0276 | TTTCGCTTCCCGCTGTTCGGCGGACAGACGGTTACGGCTACCGTAACGGCGCAAGGGCAGTT        | 2999 |
| CDC2     | TTTCGCTTCCCGCTGTTCAGGGCAGACTGTTACGGCTACCGTAACGGCGCAAGGGCAGTT          | 2843 |
| GCGS0402 | TTTCGCTTCCCGCTGTTCAGGGCAGACTGTTACGGCTACCGTAACGGCGCAAGGGCAGTT          | 2843 |
| GCGS0834 | TTTCGCTTCCCGCTGTTCGGCGGACAGACGGTTACGGCTACCGTAACGGCGCAAGGGCAGTT        | 2845 |
|          | ***** ** * ** *****                                                   |      |
| FA19     | <b>GGGTACGGCAGAAGAATTCCGGCAACGTCATCCTCCGCGCCAATACCGACGGTTCTAATAT</b>  | 2906 |
| GCGS0276 | GGGTACGGCAGAAGAATTCCGGCAACGTCATCCTCCGCGCCAATACCGACGGTTCTAATAT         | 3059 |
| CDC2     | GAGTACGGCAGAAGAATTCCGGCAACGTCATCCTCCGCGCCAATACTGATGGTTCTAATAT         | 2903 |
| GCGS0402 | GAGTACGGCAGAAGAATTCCGGCAACGTCATCCTCCGCGCCAATACTGATGGTTCTAATAT         | 2903 |
| GCGS0834 | GGGTACGGCAGAAGAATTCCGGCAACGTCATCCTCCGCGCCAATACCGACGGTTCTAATAT         | 2905 |
|          | * *****                                                               |      |
| FA19     | <b>TTACCTGAAGGATGTGGCGAAAGTCGGATTTGGGTATGGAAGACTATTCTTCTCAACCCG</b>   | 2966 |
| GCGS0276 | TTACCTGAAGGATGTGGCGAAAGTCGGATTTGGGTATGGAAGACTATTCTTCTCAACCCG          | 3119 |
| CDC2     | TTACCTGAAGGATGTGGCGAAAGTCGGATTTGGGTATGGAAGACTATTCTTCTCAACCCG          | 2963 |
| GCGS0402 | TTACCTGAAGGATGTGGCGAAAGTCGGATTTGGGTATGGAAGACTATTCTTCTCAACCCG          | 2963 |
| GCGS0834 | TTACCTGAAGGATGTGGCGAAAGTCGGATTTGGGTATGGAAGACTATTCTTCTCAACCCG          | 2965 |
|          | ***** * *****                                                         |      |
| FA19     | <b>CCTGAACGGGTAATAACCACCGGTATGGCGGTAAATGTTGTCCAACAGCGGCAATGCGAT</b>   | 3026 |
| GCGS0276 | TCTGAACGGTGTAAATAACCACCGGTATGGCGGTAAATGTTGTCCAACAGCGGCAATGCGAT        | 3179 |
| CDC2     | TCTGAACGGGTAATAACCACCGGTATGGCGGTAAATGTTGTCCAACAGCGGTAATGCGAT          | 3023 |
| GCGS0402 | TCTGAACGGGTAATAACCACCGGTATGGCGGTAAATGTTGTCCAACAGCGGTAATGCGAT          | 3023 |
| GCGS0834 | TCTGAACGGTGTAAATAACCACCGGTATGGCGGTAAATGTTGTCCAACAGCGGCAATGCGAT        | 3025 |
|          | ***** *****                                                           |      |
| FA19     | <b>GGCGACGGCAAAGGCGGTTAAAGAACGCATGGCGACGTTGGAAAAATACTTTCCTCAGGG</b>   | 3086 |
| GCGS0276 | GGCGACGGCAAAGGCGGTTAAAGAACGCATGGCGACGTTGGAAAAATACTTTCCTCAGGG          | 3239 |
| CDC2     | GGCGACGGCAAAGGCGGTTAAAGAACGCATGGCGACGTTGGAAAAATACTTTCCTCAGGG          | 3083 |
| GCGS0402 | GGCGACGGCAAAGGCGGTTAAAGAACGCATGGCGACGTTGGAAAAATACTTTCCTCAGGG          | 3083 |
| GCGS0834 | GGCGACGGCAAAGGCGGTTAAAGAACGCATGGCGGTTGGAAAAATACTTTCCTCAGGG            | 3085 |
|          | ***** *****                                                           |      |

FA19 TATGAGTTGGAAAACCCCTTACGATACTTCCAAATTCGTTGAAATTTTCGATTGAAAAAGT 3146  
GCGS0276 TATGAGCTGGAAAACCCCTTACGATACTTCCAAATTCGTCGAAATTTTCGATTGAAAAAGT 3299  
CDC2 TATGAGCTGGAAAACCCCTTACGATACTTCCAAATTCGTCGAAATTTTCGATTGAAAAAGT 3143  
GCGS0402 TATGAGCTGGAAAACCCCTTACGATACTTCCAAATTCGTCGAAATTTTCGATTGAAAAAGT 3143  
GCGS0834 TATGGGCTGGAAAACCCCTTACGATACTTCCAAATTCGTCGAAATTTTCGATTGAAAAAGT 3145  
\*\*\*\* \* \*\*\*\*

FA19 GATTCACACTTTAATCGAAGCGATGGTGCCTGGTGTGTTGTCGTAATGTACCTCTTCCTGCA 3206  
GCGS0276 GATTCATACTTTAATCGAAGCGATGGTGCCTGGTGTGTTGTCGTAATGTATCTCTTCCTGCA 3359  
CDC2 CATCCATACCCTTGTAGAGGCGATGGTGCCTGGTGTGTTGTCGTAATGTACCTCTTCCTGCA 3203  
GCGS0402 CATCCATACTTTGTAGAGGCGATGGTGCCTGGTGTGTTGTCGTAATGTATCTCTTCCTGCA 3203  
GCGS0834 GATTCACACTTTAATCGAAGCGATGGTGCCTGGTGTGTTGTCGTAATGTATCTCTTCCTGCA 3205  
\*\* \*\* \* \*\* \* \*\*

FA19 AAACATCCGTTTATACGCTGATTCCGACCATCGTCGTACCGATTTCCTGTTGGGCGGTTT 3266  
GCGS0276 AAACATCCGTTTATACGCTGATTCCGACCATCGTCGTACCGATTTCCTGTTGGGCGGTTT 3419  
CDC2 AAACATCCGTTTATACGCTGATTCCGACCATCGTCGTACCGATTTCCTGTTGGGCGGTTT 3263  
GCGS0402 AAACATCCGTTTATACGCTGATTCCGACCATCGTCGTACCGATTTCCTGTTGGGCGGTTT 3263  
GCGS0834 AAACATCCGTTTATACGCTGATTCCGACCATCGTCGTACCGATTTCCTGTTGGGCGGTTT 3265  
\*\*\*\*\*

FA19 CGCCTTCATCTCTTATATGGGCATGTCGATTAACGTATTGACGATGTTTGGCATGATATT 3326  
GCGS0276 CGCCTTCATCTCTTATATGGGCATGTCGATTAACGTACTGACCATGTTTGGCATGTTT 3479  
CDC2 CGCCTTCATCTCTTATATGGGCATGTCGATTAACGTATTGACGATGTTTGGCATGTTT 3323  
GCGS0402 CGCCTTCATCTCTTATATGGGCATGTCGATTAACGTATTGACGATGTTTGGCATGTTT 3323  
GCGS0834 CGCCTTCATCTCTTATATGGGCATGTCGATTAACGTATTGACGATGTTTGGCATGTTT 3325  
\*\*\*\*\* \* \*\*

FA19 GGTTCATCGGCATCGTGGTTCGATGACGCGATTGTTGGTGGTTGAAAACGTCGAGCGCATTAT 3386  
GCGS0276 GGTTCATCGGCATCGTGGTTCGATGACGCGATTGTTGGTGGTTGAAAACGTCGAGCGCATTAT 3539  
CDC2 GGTTCATCGGTATCGTGGTTCGATGACGCGATTGTTGGTGGTTGAAAACGTCGAGCGCATTAT 3383  
GCGS0402 GGTTCATCGGTATCGTGGTTCGATGACGCGATTGTTGGTGGTTGAAAACGTCGAGCGCATTAT 3383  
GCGS0834 GGTTCATCGGTATCGTGGTTCGATGACGCGATTGTTGGTGGTTGAAAACGTCGAGCGCATTAT 3385  
\*\*\*\*\*

FA19 GGCGGGTGAAGGCTTCCGCCCCAAGAAGCGACCAAAAAAGCGATGGGTTCAGATTTCGGG 3446  
GCGS0276 GGCGGGTGAAGGCTTCCGCCCCAAGAAGCGACCAAAAAAGCGATGGGTTCAGATTTCGGG 3599  
CDC2 GGCGGGTGAAGGCTTCCGCCCCAAGGCTGCAACCAAAAAAGCAATGGGTTCAGATTTCGGG 3443  
GCGS0402 GGCGGGTGAAGGCTTCCGCCCCAAGGCTGCAACCAAAAAAGCAATGGGTTCAGATTTCGGG 3443  
GCGS0834 GGCGGGTGAAGGCTTCCGCCCCAAGAAGCGACCAAAAAAGCGATGGGTTCAGATTTCGGG 3445  
\*\*\*\* \* \*\*

FA19 CGCGGTTCATCGGTATTACCGCCGTTCTGATTTCCGTGTTTCGTGCTTCTGGCGATGTTTCAG 3506  
GCGS0276 CGCGGTTCATCGGTATTACCGCCGTTCTGATTTCCGTGTTTCGTGCTTCTGGCGATGTTTCAG 3659  
CDC2 TGCGGTTCATCGGTATTACTGCTGTTTTGATGTCGTGTTTCGTGCTTCTGGCGATGTTTCAG 3503  
GCGS0402 TGCGGTTCATCGGTATTACTGCTGTTTTGATGTCGTGTTTCGTGCTTCTGGCGATGTTTCAG 3503  
GCGS0834 CGCGGTGGTTCGTATTACCGCCGTTATTGATTTCCGTGTTTCGTGCTTCTGGCGATGTTTCAG 3505  
\*\*\*\* \* \*\*

FA19 CGGGGCGGCGGCAATATTTACAAACAGTTTGCCTGACGATGGCGTCATCAATCGCATT 3566  
GCGS0276 CGGGGCGGCGGCAATATTTACAAACAGTTTGCCTGACGATGGCGTCATCAATCGCATT 3719  
CDC2 CGGGGCAACGGGCAATATCTATAAACAGTTTGCCTGACGATGGCGGTCATCAATCGCATT 3563  
GCGS0402 CGGGGCAACGGGCAATATCTATAAACAGTTTGCCTGACGATGGCGGTCATCAATCGCATT 3563  
GCGS0834 CGGGGCGGCGGCAATATTTACAAACAGTTTGCCTGACGATGGCGGTCATCAATCGCATT 3565  
\*\*\* \*\* \* \*\*\*\*

FA19 CTCCGCCTTCCTTGCCTGACCTTACCCCTGCTTTGTTGTTGCCACAATGTTGAAGACAAT 3626  
GCGS0276 CTCCGCCTTCCTTGCCTGACCTTACCCCTGCTTTGTTGTTGCCACAATGTTGAAGACAAT 3779  
CDC2 CTCTGCCTTCCTTGCCTGACCTTACCCCTGCTTTGTTGTTGCCACAATGTTGAAGACCAT 3623  
GCGS0402 CTCTGCCTTCCTTGCCTGACCTTACCCCTGCTTTGTTGTTGCCACAATGTTGAAGACCAT 3623  
GCGS0834 CTCCGCCTTCCTTGCCTGACCTTACCCCTGCTTTGTTGTTGCCACAATGTTGAAGACCAT 3625  
\*\*\* \*\*\*\* \* \*\*

FA19 **CCCGAAAGGGCATCACGAAGAGAAAAAGGTTCTTCGGCTGGTTCAACAAGAAATTCGA** 3686  
GCGS0276 CCCGAAAGGGCATCACGAAGAGAAAAAGGTTCTTCGGCTGGTTCAACAAGAAATTCGA 3839  
CDC2 CCCGAAAGGGCATCACGAAGAGAAAAAGGTTCTTCGGCTGGTTTAACAAAAATTCGA 3683  
GCGS0402 CCCGAAAGGGCATCACGAAGAGAAAAAGGTTCTTCGGCTGGTTTAACAAAAATTCGA 3683  
GCGS0834 TCAAAAGGGGCATCACGAAGAGAAAAAGGCTTTTCGGCTGGTTCAACAAGAAATTCAC 3685  
\* \*\* \*\*\*\*\* \*\* \* \*\* \*\*\*\*\* \*\*\*\*\* \*\*\*\*\* \*\*\*\*\*

FA19 **CAGTTGGACGCACGGCTACGAAGGCCGGGTTGCCAAAGTGC TGC GTAAGACTTTCCGCAT** 3746  
GCGS0276 CAGTTGGACGCACGGTTACGAAGGCCGGGTTGCCAAAGTGC TGC GTAAGACTTTCCGCAT 3899  
CDC2 CAACTGGACACACGGCTACGAAGGCTGGGTTGCCAAAGTAT TGC GCAAGACTTTGCCGCAT 3743  
GCGS0402 CAACTGGACACACGGCTACGAAGGCTGGGTTGCCAAAGTAT TGC GCAAGACTTTGCCGCAT 3743  
GCGS0834 TGCTTGGACGCACGGCTACGAAGGCCGGGTTGCCAAAGT TTTGCGTAAGACTGTGCGTAT 3745  
\*\*\*\*\* \*\*\*\*\* \*\*\*\*\* \*\*\*\*\* \*\*\*\*\* \*\*\*\*\* \* \*\* \*\*

FA19 **GATGGTTGTC TATATCGGCTTGCGCGTTGTGGGCGTGTTCCTGTTTATGCGCCTGCCGAC** 3806  
GCGS0276 GATGGTTGTC TATATCGGCTTGCGCGTTGTGGGCGTGTTCCTGTTTATGCGCTGCCGAC 3959  
CDC2 GATGGTTGTTTACGTTGGTTTGCGCGTTGTGGGCGTATTCCTGTTTATGCGCCTGCCGAC 3803  
GCGS0402 GATGGTTGTTTACGTTGGTTTGCGCGTTGTGGGCGTATTCCTGTTTATGCGCCTGCCGAC 3803  
GCGS0834 GATGGTTGTTTATATCGGCTTGCGCGTTGTGGGCGTATTCCTGTTTATGCGCCTGCCGAC 3805  
\*\*\*\*\* \*\* \* \*\* \*\*\*\*\* \*\*\*\*\* \*\*\*\*\* \*\*\*\*\* \*\*\*\*\*

FA19 **TTTCGTTCTGCGGACCGAAGACCAAGGCTTCGTTATGGTCAGCGTGCAACTGCCTGCCGG** 3866  
GCGS0276 TTCATTCTGCGGACCGAAGACCAAGGCTTCGTTATGGTCAGCGTGCAACTGCCTGCAGG 4019  
CDC2 TTCGTTCTGCGGACCGAAGACCAAGGCTTCGTTATGGTCAGCGTGCAACTGCCTGCCGG 3863  
GCGS0402 TTCGTTCTGCGGACCGAAGACCAAGGCTTCGTTATGGTCAGCGTGCAACTGCCTGCCGG 3863  
GCGS0834 CTCATTCTGCGGACCGAAGACCAAGGCTTCGTTATGGTCAGCGTGCAACTGCCTGCCGG 3865  
\*\* \*\*\* \*\*\*\*\* \*\*\*\*\* \*\*\*\*\* \*\*\*\*\* \*\*\*\*\* \*\*

FA19 **TGCGACCAAAGAGCGCACCGATGCGACGCTAGCACAAAGTTACCCAAGTGGCGAAAAGCAT** 3926  
GCGS0276 AGCGACCAAAGAGCGCACCAATGCGACTTTGGCGCAAGTTACCCAAGTGGCGAAAAGCAT 4079  
CDC2 TGCGACCAAAGAGCGCACCGATGCGACGCTGGCGCAAGTAACGCAGTTGGCAAAAAGTAT 3923  
GCGS0402 TGCGACCAAAGAGCGCACCGATGCGACGCTGGCGCAAGTAACGCAGTTGGCAAAAAGTAT 3923  
GCGS0834 CGCGACCAAAGAGCGTACCGATGCGACGCTGGCGCAAGTTACACAATTGGCAAAAAGCAT 3925  
\*\*\*\*\* \*\*\*\*\* \*\*\* \*\*\*\*\* \* \*\* \*\*\*\*\* \*\* \*\* \*\*\*\* \*\*\*\*\* \*\*

FA19 **TTCCCGAAATTTGAAAACATCATTACCGTTTCCGGCTTCAGCTTTTCGGGCAGCGGTTCAGAA** 3986  
GCGS0276 TCCTGAAATAGAAAACATCATTACCGTTTCCGGCTTCAGCTTTTCGGGCAGCGGTTCAGAA 4139  
CDC2 TCCTGAAATTTGAAAACATCATTACCGTTTCCGGCTTCAGCTTTTCGGGCAGCGGTTCAGAA 3983  
GCGS0402 TCCTGAAATTTGAAAACATCATTACCGTTTCCGGCTTCAGCTTTTCGGGCAGCGGTTCAGAA 3983  
GCGS0834 TCCTGAAATTTGAAAACATCATTACCGTTTCCGGCTTCAGCTTTTCGGGCAGCGGTCAGAA 3985  
\*\*\* \*\*\*\*\* \*\*\*\*\* \*\*\*\*\* \*\*\*\*\* \*\*\*\*\* \*\*\*\*\* \*\*\*\*\*

FA19 **TATGGCGATGGGTTTTGCCATATTGAAAGATTGGAACGAACGTACCGCCTCCGGCAGCGA** 4046  
GCGS0276 TATGGCGATGGGTTTTGCCATATTGAAAGATTGGAACGAGCGTACCGCGCCGGCAGCGA 4199  
CDC2 TATGGCAATGGGTTTTGCCATGCTCAAAGACTGGAACGAGCGTAAAACCCCGGCAGCGA 4043  
GCGS0402 TATGGCAATGGGTTTTGCCATGCTCAAAGACTGGAACGAGCGTAAAACCCCGGCAGCGA 4043  
GCGS0834 TATGGCGATGGGTTTTGCGATGCTTAAGGATTGGGACGAACGTAAAACCCCGGCAGCGA 4045  
\*\*\*\*\* \*\*\*\*\* \*\* \* \*\* \*\* \*\* \*\* \*\*\*\*\* \*\*\*\*\* \* \* \*\*\*\*\*

FA19 **TGCCGTTGCGGTTGCCGGCAAGCTGACGGGTATGATGATGGGGACGCTTAAAGACGGTTT** 4106  
GCGS0276 TGCCGTTGCGATTGCCGGCAAGCTGACGGGTATGATGATGGGGACGCTTAAAGACGGTTT 4259  
CDC2 TGCGGAATCGGTTGCAGGCAAAATTGACCGGTATGATGATGGGGACGCTTAAAGACGGTTT 4103  
GCGS0402 TGCGGAATCGGTTGCAGGCAAAATTGACCGGTATGATGATGGGGACGCTTAAAGACGGTTT 4103  
GCGS0834 TGCCGTTGCGGTTGCCGGCAAGCTGACGGGTATGATGATGGGGACGCTTAAAGACGGTTT 4105  
\*\*\* \* \*\* \*\*\*\*\* \*\*\*\*\* \*\*\*\*\* \*\*\*\*\* \*\*\*\*\* \*\*\*\*\* \*\*\*\*\*

FA19 **CGGCATCGCCGTCGTCGCCCTCCGATTCTGGAGTTGGGCAACGGTTCCGGCTTGAGCAT** 4166  
GCGS0276 TGGCATCGCCGTCGTCGCCCTCCGATTCTGGAGTTGGGCAACGGTTCCGGCTTGAGCAT 4319  
CDC2 CGGCATCGCCATCGTTCCGCCCTCCGATTATGGAGTTGGGCAACGGTTCCGGTTTGAGCAT 4163  
GCGS0402 CGGCATCGCCATCGTTCCGCCCTCCGATTATGGAGTTGGGCAACGGTTCCGGTTTGAGCAT 4163  
GCGS0834 CGGCATCGCCATCGTTCCGCCCTCCGATTATGGAGTTGGGCAACGGTTCCGGTTTGACCAT 4165  
\*\*\*\*\* \*\*\*\*\* \*\*\*\*\* \*\*\*\*\* \*\*\*\*\* \*\*\*\*\* \*\*\*\*\* \*\*\*\*\*



FA19 CAACCTGCAAGACCGCAACAATACCGGCCATACCGCATTGCTGGCGAAGCGCAACGAGCT 4226  
GCGS0276 CAACCTGCAAGACCGCAACAATACCGGCCATACCGCATTGCTGGCGAAGCGCAACGAGTT 4379  
CDC2 CAACCTGCAAGACCGCAACAATACCGGTCATGCCGCATTGCTGGCCAAACGCAACGAGTT 4223  
GCGS0402 CAACCTGCAAGACCGCAACAATACCGGTCATGCCGCATTGCTGGCCAAACGCAACGAGTT 4223  
GCGS0834 CAACCTGCAAGATCGCAACAATACCGGTCATGCCGCATTGCTGGCCAAACGCAACGAGTT 4225  
\*\*\*\*\* \*\*

FA19 GATTCAGAAAATGCGTGCCAGCGGTTTGTGTTGACCCAGCACCGTCCGTGCCGGCGGTTT 4286  
GCGS0276 GATTCAGAAAATGCGTGCCAGCGGTTTGTGTTGACCCAGCACCGTCCGTGCCGGCGGTTT 4439  
CDC2 GATTCAGAAAATGCGTACCAGCGGTTTGTGTTAACCCAAGTACCGTCCGTGCCGGCGGTTT 4283  
GCGS0402 GATTCAGAAAATGCGTACCAGCGGTTTGTGTTAACCCAAGTACCGTCCGTGCCGGCGGTTT 4283  
GCGS0834 GATTCAGAAAATGCGTACCAGCGGTTTGTGTTAACCCAGCACCGTCCGTGCCGGCGGTTT 4285  
\*\*\*\*\* \*\*

FA19 GGAAGACTCGCCGAGTTGAAAATCGACATCAACCGTGCCGCGAGCGGCGGCGCAAGGCAT 4346  
GCGS0276 GGAAGACTCGCCGAGTTGAAAATCGACATCAACCGTGCCGCGCGGCGGCGGCGCAAGGCAT 4499  
CDC2 GGAAGACGCGCCGAGTTGAAAATCGACATCAACCGTGCCGCGCGGCGGCGGCGCAAGGCAT 4343  
GCGS0402 GGAAGACGCGCCGAGTTGAAAATCGACATCAACCGTGCCGCGCGGCGGCGGCGCAAGGCAT 4343  
GCGS0834 GGAAGACGCGCCGAGTTGAAAATCGACATCAACCGTTCCGGCGGCTTCGGCACAAGGTAT 4345  
\*\*\*\*\* \*\*

FA19 TTCGTTTGCCGACATCCGCACCGCATTGGCAAGCGCGCTGAGTTCGTCTTATGTCAGCGA 4406  
GCGS0276 TTCGTTTGCCGACATCCGCACCGCATTGGCAAGTGCCTGAGTTCGTCTTATGTCAGCGA 4559  
CDC2 TTCGTTTGCCGACATCCGCACCGCATTGGCAAGCGCGCTGAGTTCGTCTTATGTCAGCGA 4403  
GCGS0402 TTCGTTTGCCGACATCCGCACCGCATTGGCAAGCGCGCTGAGTTCGTCTTATGTCAGCGA 4403  
GCGS0834 TTCGTTTGCCGACATCCGTAATGCAATGCGCTGGGTTTCGTCTTACGTCAACGA 4405  
\*\*\* \*\*\*\*\* \*\*

FA19 CTTCCCGAACCAAGGCCGCTCGCAACGCGTGATGGTGCAGGCCGACGAGGATGCCCGTAT 4466  
GCGS0276 CTTCCCGAACCAAGGCCGCTCGCAGCGCGTGATGGTGCAGGCCGACGAGGATGCCCGTAT 4619  
CDC2 CTTCCCGAACCAAGGCCGCTCGCAGCGCGTGATGGTGCAGGCCGACGAGGATGCCCGTAT 4463  
GCGS0402 CTTCCCGAACCAAGGCCGCTCGCAGCGCGTGATGGTGCAGGCCGACGAGGATGCCCGTAT 4463  
GCGS0834 CTTCCCGAACCAAGGCCGTTTGCAGCGCGTGATGGTGCAGGCCGATGCTTCGGCACGTAT 4465  
\*\*\*\*\* \*\*

FA19 GCAGCCTGCCGATATTTTGAACCTGACCGTGCCGAACAAATCCGGCGTCGCCGTACCGCT 4526  
GCGS0276 GCAGCCTGCCGATATTTTGAACCTGACCGTGCCGAACAAATCCGGCGTTGCCGTACCGCT 4679  
CDC2 GCAGCCTGCCGACATCTTGAATCTGACTGTGCCGAATAGCTCGGGCATTGCCGTTCCGCT 4523  
GCGS0402 GCAGCCTGCCGACATCTTGAATCTGACTGTGCCGAATAGCTCGGGCATTGCCGTTCCGCT 4523  
GCGS0834 GCAGCCTGCCGACATCTTGAATCTGACTGTGCCGAATAGCTCGGGCATTGCCGTTCCGCT 4525  
\*\*\*\*\* \*\*

FA19 TTCCACCATTGCTACTGTTTCTTGGGAAAACGGTACGGAACAGAGCGTACGCTTCAACGG 4586  
GCGS0276 TTCCACCATTGCTACTGTTTCTTGGGAAAACGGTACGGAACAGAGCGTACGCTTCAACGG 4739  
CDC2 TTCTTCGATTGCCACCGTTTCTTGGCAGATGGGTACAGAACAGAGCGTTCTGTTCAACGG 4583  
GCGS0402 TTCTTCGATTGCCACCGTTTCTTGGCAGATGGGTACAGAACAGAGCGTTCTGTTTCAACGG 4583  
GCGS0834 TTCTTCGATTGCCACCGTTTCTGTCAGATGGGTACGGAACAGAGCGTTCTGTTTCAACGG 4585  
\*\*\* \* \*\*\*\*\* \*\*

S821A K823E

FA19 TTATCCCTCGATGAAGCTGTCCGCTTCGCCGCAACCGGCGTTTCCACCGGCAGGCTAT 4646  
GCGS0276 TTATCCCTCGATGGATCTGTCCGCTTCGCCGCAACCGGCGTTTCCACCGGCAGGCTAT 4799  
CDC2 TTATCCC GCTATG GAA CTGTCCGGTTCGCCGCAACCGGCGTTTCCACCGGTCAGGCCAT 4643  
GCGS0402 TTATCCCGCTATGGAAGTGTCCGGTTCGCCGCAACCGGCGTTTCCACCGGTCAGGCCAT 4643  
GCGS0834 TTATCCCGCTATGGAAGTGTCCGGTTCGCCGCAACAGGTGTTTCCACCGGTCAGGCCAT 4645  
\*\*\*\*\* \* \*\*

FA19 GGCGGCGGTTCAAAAATGGTTGACGAATTGGGCGGCGGTTACAGCTTCGAATGGGGTGG 4706  
GCGS0276 GGCGGCGGTTCAAAAATGGTTGACGAATTGGGCGGCGGTTACAGCCTCGAATGGGGCGG 4859  
CDC2 GGAGGCAGTTCAAAAATGGTTGACGAATTGGGCGGCGGTTACAGCCTGGAGTGGGGCGG 4703  
GCGS0402 GGAGGCAGTTCAAAAATGGTTGACGAATTGGGCGGCGGTTACAGCCTGGAGTGGGGCGG 4703  
GCGS0834 GGAGGCAGTTCAAAAATGGTTGACGAATTGGGCGGCGGTTACAGCCTGGAGTGGGGCGG 4705  
\*\* \*\*

FA19 ACAGTCGCGCGAAGAGGGCAAAGGCGGCTCGCAAACCCTGATTTTGTACGGTTTGGCGGT 4766  
GCGS0276 ACAGTCGCGCGAAGAGGGCAAAGGCGGCTCGCAAACCCTGATTTTGTACGGTTTGGCGGT 4919  
CDC2 ACAGTCGCGCGAAGAGGGCAAAGGCGGTTTCGCAAACCATTGCCCTTTACGCGCTTGCCGC 4763  
GCGS0402 ACAGTCGCGCGAAGAGGGCAAAGGCGGTTTCGCAAACCATTGCCCTTTACGCGCTTGCCGC 4763  
GCGS0834 ACAGTCGCGCGAAGAGGGCAAAGGCGGTTTCGCAAACCATTGCCCTTTACGCGCTTGCCGC 4765  
\*\*\*\*\* \* \* \* \*

FA19 TGCAGCCGATTTTGGTACTTGCCGCGCTTTATGAAAGCTGGTCGATTCCGCTGGCGGT 4826  
GCGS0276 TGCAGCCGATTTTGGTACTTGCCGCGCTTTATGAAAGCTGGTCGATTCCGCTGGCGGT 4979  
CDC2 CGTTGCCGCTTCTTGGTGCCTGCAGCACTTATGAAAGCTGGTCTATTCCGCTGGCCGT 4823  
GCGS0402 CGTTGCCGCTTCTTGGTGCCTGCAGCACTTATGAAAGCTGGTCTATTCCGCTGGCCGT 4823  
GCGS0834 CGTTGCCGCTTCTTGGTGCCTGCAGCACTTATGAAAGCTGGTCTATTCCGCTGGCCGT 4825  
\* \*\* \* \* \* \* \* \* \* \* \* \* \* \* \* \* \* \* \* \* \* \* \* \*

FA19 CATCCTTGTGATTCGGTTGGGTTTGATCGGTGCGGCTGCGGGCGTAACCGGGCGCAACCT 4886  
GCGS0276 CATCCTTGTGATTCGGTTGGGTTTGATCGGTGCGGCTGCGGGCGTAACCGGGCGCAACCT 5039  
CDC2 TCTGTGGTGTATGCCTTTGGGCTTGGCGGGCGGCTGCGGGCGTAACCGGGCGCAACCT 4883  
GCGS0402 TCTGTGGTGTATGCCTTTGGGCTTGGCGGGCGGCTGCGGGCGTAACCGGGCGTAACCT 4883  
GCGS0834 TCTGTGGTGTATGCCTTTAGGCTTGGCGGGCGGCTGCGGGCGTAACCGGGCGTAACCT 4885  
\* \*\* \* \* \* \* \* \* \* \* \* \* \* \* \* \* \* \* \* \* \* \* \* \*

FA19 GTTTGAAGGACTGTTGGGCAGCGTTCCCTCGTTTGCCAACGACATCTACTTCCAAGTCGG 4946  
GCGS0276 GTTTGAAGGACTGTTGGGCAGCGTTCCCTCGTTTGCCAACGACATCTACTTCCAAGTCGG 5099  
CDC2 GTTTGAAGGATGTTGGGCAGCGTTCCCTCGTTTGCCAACGACATCTACTTCCAAGTCGG 4943  
GCGS0402 GTTTGAAGGATGTTGGGCAGCGTTCCCTCGTTTGCCAACGACATCTACTTCCAAGTCGG 4943  
GCGS0834 GTTTGAAGGATGTTGGGCAGCGTTCCCTCGTTTGCCAACGACATCTACTTCCAAGTCGG 4945  
\*\*\*\*\* \* \* \* \* \* \* \* \* \* \* \* \* \* \* \* \* \* \* \* \* \* \*

FA19 TTTCGTTACTGTGATGGGTTTGTAGTGCAGAAAACGCGATTCTGATTATCGAATTTGCCAA 5006  
GCGS0276 TTTCGTTACTGTGATGGGTTTGTAGTGCAGAAAACGCGATTCTGATTATCGAATTTGCCAA 5159  
CDC2 TTTCGTTACTGTGATGGGTTTGTAGTGCAGAAAACGCGATTCTGATTATCGAATTTGCCAA 5003  
GCGS0402 TTTCGTTACTGTGATGGGTTTGTAGTGCAGAAAACGCGATTCTGATTATCGAATTTGCCAA 5003  
GCGS0834 TTTCGTTACTGTGATGGGTTTGTAGTGCAGAAAACGCGATTCTGATTATCGAATTTGCCAA 5005  
\*\*\*\*\* \* \* \* \* \* \* \* \* \* \* \* \* \* \* \* \* \* \* \* \* \* \*

FA19 AGACCTTCAAGCGCAAGGGAAAAGCGCGGTGGAAGCCGCTTTGGAGGCAGCCCGCTGCG 5066  
GCGS0276 AGACCTTCAAGCGCAAGGGAAAAGCGCGGTGGAAGCCGCTTTGGAGGCAGCCCGCTGCG 5219  
CDC2 AGACCTTCAAGCGCAAGGGAAAAGCGCGGTGGAAGCCGCTTTGGAGGCAGCCCGCTGCG 5063  
GCGS0402 AGACCTTCAAGCGCAAGGGAAAAGCGCGGTGGAAGCCGCTTTGGAGGCAGCCCGCTGCG 5063  
GCGS0834 AGACCTTCAAGCGCAAGGGAAAAGCGCGGTGGAAGCCGCTTTGGAGGCAGCCCGCTGCG 5065  
\*\*\*\*\* \* \* \* \* \* \* \* \* \* \* \* \* \* \* \* \* \* \* \* \* \* \*

FA19 TTTCGCTCCGATTATCATGACCTCGTTTGCCTTTATTTTGGGCGTGGTTCCCTGTATAT 5126  
GCGS0276 TTTCGCTCCGATTATCATGACCTCGTTTGCCTTTATTTTGGGCGTGGTTCCCTGTATAT 5279  
CDC2 TTTCGCTCCGATTATCATGACCTCGTTTGCCTTTATTTTGGGCGTGGTTCCCTGTATAT 5123  
GCGS0402 TTTCGCTCCGATTATCATGACCTCGTTTGCCTTTATTTTGGGCGTGGTTCCCTGTATAT 5123  
GCGS0834 TTTCGCTCCGATTATCATGACCTCGTTTGCCTTTATTTTGGGCGTGGTTCCCTGTATAT 5125  
\*\*\*\*\* \* \* \* \* \* \* \* \* \* \* \* \* \* \* \* \* \* \* \* \* \* \*

FA19 TGCCGCTGGTGCAGTCTGCCAGCCAGCGGCCATCGGCACGACCGTATTCTGGGGGAT 5186  
GCGS0276 TGCCGCGGTGCAAGCTCCGCCAGCCAGCGGCCATCGGCACGACCGTATTCTGGGGGAT 5339  
CDC2 TGCCGCTGGTGCAGTCTGCCAGCCAGCGGCCATCGGCACGACCGTATTCTGGGGGAT 5183  
GCGS0402 TGCCGCTGGTGCAGTCTGCCAGCCAGCGGCCATCGGCACGACCGTATTCTGGGGGAT 5183  
GCGS0834 TGCCGCGGTGCAAGCTCCGCCAGCCAGCGGCCATCGGCACGACCGTATTCTGGGGGAT 5185  
\*\*\*\*\* \* \* \* \* \* \* \* \* \* \* \* \* \* \* \* \* \* \* \* \* \* \*

FA19 GTTGGTTCGGCAGCTCTTGTCCGTGTTCCCTTGTTCGGCTTTTCTATGTAGTGGTGCAGAA 5246  
GCGS0276 GTCATCGGCACGCTCTTGTCCGTGTTCCCTTGTTCGGCTTTTCTATGTGGTGGTGCAGAA 5399  
CDC2 GTCATCGGCACGCTTTTATCCGTGTTCCCTTGTTCGGCTTTTCTATGTGGTGGTGCAGAA 5243  
GCGS0402 GTCATCGGCACGCTTTTATCCGTGTTCCCTTGTTCGGCTTTTCTATGTGGTGGTGCAGAA 5243  
GCGS0834 GTCATCGGCACGCTTTTGTCCGTGTTCCCTTGTTCGGCTTTTCTATGTGGTGGTGCAGAA 5245  
\* \* \* \* \* \* \* \* \* \* \* \* \* \* \* \* \* \* \* \* \* \* \*



|          |                                                                 |      |
|----------|-----------------------------------------------------------------|------|
| FA19     | ACGAACTCGATCTGTTCCGGCGCGTGCAGCAGCAGCGAAGCAGCACTGCAAGGCTATT      | 5843 |
| GCGS0276 | ACGAACTCGATCTGTTCCGGCGCGTGCAGCAGCAGCGAAGCAGCACTGCAAGGCTATT      | 5996 |
| CDC2     | ACGAACTCGAAGCTGTTCCGGACGCGTCCGACAGCAGCAGCGAGGCGGCACTGCAAGGCTATT | 5843 |
| GCGS0402 | ACGAACTCGAAGCTGTTCCGGACGCGTCCGACAGCAGCAGCGAGGCGGCACTGCAAGGCTATT | 5843 |
| GCGS0834 | ACGAACTCGATCTGTTCCGGCGGTGTGCAGCAGCAGCGAGGCGAGCACTGCAAGGCTATT    | 5842 |
|          | ***** ** ** ***** ** *****                                      |      |
| FA19     | TTGCCAGCGTTGCCAACC CGCATGCGGCACATTTGAGCTTGATTGCCACC GTTGCCAAAG  | 5903 |
| GCGS0276 | TTGCCAGCGTTGCCAACC CGCATGCGGCACATTTGAGCTTGATTGCCACC GTTGCCAAAG  | 6056 |
| CDC2     | TTGCCAGCACCGCAACC CGCATGCGGCACATTTGAGCTTGATTGCCACC GTTGCCAAAG   | 5903 |
| GCGS0402 | TTGCCAGCACCGCAACC CGCATGCGGCACATTTGAGCTTGATTGCCACC GTTGCCAAAG   | 5903 |
| GCGS0834 | TCGCCAGCACCGCAACC CGCATGCGGCACATTTGAGCTTGATTGCCACC GTTGCCAAAG   | 5902 |
|          | * ***** *****                                                   |      |
| FA19     | CCTATTTCAACGAGCGTTATGCCGAAGAAGCGATGTCTTTGGCGCAGCGTGTCTTGAAAA    | 5963 |
| GCGS0276 | CCTATTTCAACGAGCGTTATGCCGAAGAAGCGATGTCTTTGGCGCAGCGTGTCTTGAAAA    | 6116 |
| CDC2     | CCTATTTTAAACGAGCGTTATGCCGAAGAAGCGATGTCTTTGGCGCAGCGTGTCTTGAAAA   | 5963 |
| GCGS0402 | CCTATTTTAAACGAGCGTTATGCCGAAGAAGCGATGTCTTTGGCGCAGCGTGTCTTGAAAA   | 5963 |
| GCGS0834 | CCTATTTCAACGAAAGCGTATGCCGAAGAAGCGATGTCTTTGGCGCAGCGTGTCTTGAAAA   | 5962 |
|          | ***** ** *****                                                  |      |
| FA19     | CGCGCGAGGAAACCTACAAGCTGTCCGAATTGCGGTACAAGGCAGGCGTGATTTCCGCCG    | 6023 |
| GCGS0276 | CGCGCGAGGAAACCTACAAGCTGTCCGAATTGCGGTACAAGGCAGGCGTGATTTCCGCCG    | 6176 |
| CDC2     | CGCGCGAGGAAACCTACAAGCTGTCCGAATTGCGGTATAAGGCAGGCGTAATTTCCGCCG    | 6023 |
| GCGS0402 | CGCGCGAGGAAACCTACAAGCTGTCCGAATTGCGGTATAAGGCAGGCGTAATTTCCGCCG    | 6023 |
| GCGS0834 | CGCGCGAGGAAACCTACAAGCTGTCCGAATTGCGGTACAAGGCAGGCGTGATTTCCGCCG    | 6022 |
|          | ***** ** *****                                                  |      |
| FA19     | TCGCCCTGCGCCAGCAGGAAGCCTTGATTGAACTGCGCAAGCCGATTATGCCCATGCCG     | 6083 |
| GCGS0276 | TCGCCCTGCGCCAGCAGGAAGCCTTGATTGAACTGCGCAAGCCGATTATGCCCATGCCG     | 6236 |
| CDC2     | TCGCCCTGCGTCAGCAGGAAGCCTTGATCGAATCCGCCAAGCCGATTATGCCCATGCCG     | 6083 |
| GCGS0402 | TCGCCCTGCGTCAGCAGGAAGCCTTGATCGAATCCGCCAAGCCGATTATGCCCATGCCG     | 6083 |
| GCGS0834 | TCGCCCTGCGCCAGCAGGAAGCCTTGATTGAACTGCGCAAGCCGATTATGCCCATGCCG     | 6082 |
|          | ***** ***** ** *****                                            |      |
| FA19     | CGCGCAGCCGCGAACAGGCGCGCAATGCCTTGGAACCTTGATTAACCGTCCGATACCCG     | 6143 |
| GCGS0276 | CGCGCAGCCGCGAACAGGCGCGCAATGCCTTGGAACCTTGATTAACCGTCCGATACCCG     | 6296 |
| CDC2     | CGCGCAGCCGCGAGCAGGCGCGCAATGCCTTGGAACCTTGATTAACCAACCGATACCCG     | 6143 |
| GCGS0402 | CGCGCAGCCGCGAGCAGGCGCGCAATGCCTTGGAACCTTGATTAACCAACCGATACCCG     | 6143 |
| GCGS0834 | CGCGCAGCCGCGAACAGGCGCGCAATGCCTTGGAACCTTGATTAACCAACCGATACCCG     | 6142 |
|          | ***** ***** ***** ***** *****                                   |      |
| FA19     | AAGACCTGCCCGCCGGTTTGCCGTTGGACAAGCAGTTTTTTGTTGAAAAACTGCCGTGCCG   | 6203 |
| GCGS0276 | AAGACCTGCCCGCCGGTTTGCCGTTGGACAAGCAGTTTTTTGTTGAAAAACTGCCGTGCCG   | 6356 |
| CDC2     | ACGACCTGCCCGCCGGTTTGCCGTTGGACAAGCAGTTTTTTGTTGAGAAGCTGCCGGCCG    | 6203 |
| GCGS0402 | ACGACCTGCCCGCCGGTTTGCCGTTGGACAAGCAGTTTTTTGTTGAGAAGCTGCCGGCCG    | 6203 |
| GCGS0834 | ACGACCTGCCCGCCGGTTTGCCCTAGACAAGCAGTTTTTTGTTGAAAAACTGCCGGCCG     | 6202 |
|          | * ***** * ***** ** *****                                        |      |
| FA19     | GTTTGAGTTCCGAAGTATTGCTCGACCGTCCCGACATCCGCGCCGCCGAACACGCGCTCA    | 6263 |
| GCGS0276 | GTTTGAGTTCCGAAGTATTGCTCGACCGTCCCGACATCCGCGCCGCCGAACACGCGCTCA    | 6416 |
| CDC2     | GTTTGAGTTCCGAAGTATTGCTCGACCGTCCCGACATACGCGCCGCCGAACACGCGCTCA    | 6263 |
| GCGS0402 | GTTTGAGTTCCGAAGTATTGCTCGACCGTCCCGACATACGCGCCGCCGAACACGCGCTCA    | 6263 |
| GCGS0834 | GTTTGAGTTCCGAAGTATTGCTCGACCGTCCCGACATCCGTCGCCGCCGAACACGCGCTCA   | 6262 |
|          | ***** ** *****                                                  |      |
| FA19     | AACAGGCAAACGCCAATATCGGTGCGGCGCGCCGCCTTTTCCCGTCCATCCGCCTGA       | 6323 |
| GCGS0276 | AACAGGCAAACGCCAATATCGGTGCGGCGCGCCGCCTTTTCCCGTCCATCCGCCTGA       | 6476 |
| CDC2     | AACAGGCAAACGCCAATATCGGTGCGGCACGCGCCGCCTTTTCCCATCCATCCGCCTGA     | 6323 |
| GCGS0402 | AACAGGCAAACGCCAATATCGGTGCGGCACGCGCCGCCTTTTCCCATCCATCCGCCTGA     | 6323 |
| GCGS0834 | AACAGGCAAACGCCAATATCGGTGCGGCACGCGCCGCCTTTTCCCATCCATCCGCCTGA     | 6322 |
|          | ***** ***** ***** *****                                         |      |

|          |                                                                |      |
|----------|----------------------------------------------------------------|------|
| FA19     | CCGGAAGCGTCGGTACGGGTTCTGTGCAATTGGGCGGGCTGTTCAAAGCGGCACGGGCG    | 6383 |
| GCGS0276 | CCGGAAGCGTCGGTACGGGTTCTGTGCAATTGGGCGGGCTGTTCAAAGCGGCACGGGCG    | 6536 |
| CDC2     | CCGGAAGCGTCGGTACGGGTTCTGCCGAATTGGGCGGGCTGTTCAAAGCGGCACGGGCG    | 6383 |
| GCGS0402 | CCGGAAGCGTCGGTACGGGTTCTGCCGAATTGGGCGGGCTGTTCAAAGCGGCACGGGCG    | 6383 |
| GCGS0834 | CCGGAAGCGTCGGTACGGGTTCTGCCGAATTGGGCGGGCTGTTCAAAGCGGCACGGGCG    | 6382 |
|          | *****                                                          |      |
| FA19     | TTTGGGCGTTCGCGCCGCTCTATTACCCTGCCGATTTTTACTTGGGGAACGAACAAGGCGA  | 6443 |
| GCGS0276 | TTTGGGCGTTCGCGCCGCTCTATTACCCTGCCGATTTTTACTTGGGGAACGAACAAGGCGA  | 6596 |
| CDC2     | TTTGGTTCGTTTGCGCCGCTCTATTGCCCTGCCGATTTTTACTTGGGGAACGAACAAGGCGA | 6443 |
| GCGS0402 | TTTGGTTCGTTTGCGCCGCTCTATTGCCCTGCCGATTTTTACTTGGGGAACGAACAAGGCGA | 6443 |
| GCGS0834 | TTTGGTTCGTTTGCGCCGCTCTATTACCCTGCCGATTTTTACTTGGGGAACGAACAAGGCGA | 6442 |
|          | *****                                                          |      |
| FA19     | ACCTTGATGTGGCAAACCTGCGCCAACAGGCACAAATGTTGCCTATGAATCCGCCGTCC    | 6503 |
| GCGS0276 | ACCTTGATGTGGCAAACCTGCGCCAACAGGCACAAATGTTGCCTATGAATCCGCCGTCC    | 6656 |
| CDC2     | ACCTTGATGCAGCCAAGCTGCGCCAACAGGCACAAATCGTTGCCTATGAATCCGCCGTAC   | 6503 |
| GCGS0402 | ACCTTGATGCAGCCAAGCTGCGCCAACAGGCACAAATCGTTGCCTATGAATCCGCCGTAC   | 6503 |
| GCGS0834 | ACCTGGATGCAGTCAAGCTGCGCCAACAGGCACAAATCGTTGCCTATGAATCCGCCGTCC   | 6502 |
|          | *****                                                          |      |
| FA19     | AATCCGCCTTTCAAGACGTGGCAAACGCATTGGCGGCGCGGAGCAGCTGGATAAAGCCT    | 6563 |
| GCGS0276 | AATCCGCCTTTCAAGACGTGGCAAACGCATTGGCGGCGCGGAGCAGCTGGATAAAGCCT    | 6716 |
| CDC2     | AATCCGCCTTTCAAGACGTGGCAAACGCATTGGCGGCGCGGAGCAGCTGGATAAAGCCT    | 6563 |
| GCGS0402 | AATCCGCCTTTCAAGACGTGGCAAACGCATTGGCGGCGCGGAGCAGCTGGATAAAGCCT    | 6563 |
| GCGS0834 | AATCCGCATTTCAAGATGTGGCAAACGCATTGGCGGCGCGGAGCAGCTGGATAAAGCCT    | 6562 |
|          | *****                                                          |      |
| FA19     | ATGACGCTTTAAGCAAACAAGCCGCGCCTCTAAAGAAGCGTTGCGCTTGGTCGGACTGC    | 6623 |
| GCGS0276 | ATGACGCTTTAAGCAAACAAGCCGCGCCTCTAAAGAAGCGTTGCGCTTGGTCGGACTGC    | 6776 |
| CDC2     | ATGCCGCTTTAAGCAAACAAGCCGCGCCTCTAAAGAAGCGTTGCGCTTGGTCGGCCTGC    | 6623 |
| GCGS0402 | ATGCCGCTTTAAGCAAACAAGCCGCGCCTCTAAAGAAGCGTTGCGCTTGGTCGGCCTGC    | 6623 |
| GCGS0834 | ATGACGCTTTAAGCAAACAAGCCGCGCCTCTAAAGAAGCGTTGCGCTTGGTCGGCCTGC    | 6622 |
|          | ***                                                            |      |
| FA19     | GTTACAAACACGGCGTATCCGGCGCGCTCGATTGCTCGATGCGGAACGCATCAGCTATT    | 6683 |
| GCGS0276 | GTTACAAACACGGCGTATCCGGCGCGCTCGATTGCTCGATGCGGAACGCAGCAGCTATT    | 6836 |
| CDC2     | GTTACAAACACGGCGTATCCGGCGCGCTCGACTTGCTCGATGCGGAACGCAGCAGCTATT   | 6683 |
| GCGS0402 | GTTACAAACACGGCGTATCCGGCGCGCTCGACTTGCTCGATGCGGAACGCAGCAGCTATT   | 6683 |
| GCGS0834 | GTTACAAACACGGCGTATCCGGCGCGCTCGACTTGCTCGATGCGGAACGCAGCAGCTATT   | 6682 |
|          | *****                                                          |      |
| FA19     | CGGCGGAAGGTGCGGCTTTGTGCGGCACAACGACCCGCGCCGAAAACCTTGCCGATTTGT   | 6743 |
| GCGS0276 | CGGCGGAAGGTGCGGCTTTGTGCGGCACAACGACCCGCGCCGAAAACCTTGCCGATTTGT   | 6896 |
| CDC2     | CGGCGGAGGTGCGGCTTTGTGCGGCACAACGACCCGCGCCGAAAACCTTGCCGATTTGT    | 6743 |
| GCGS0402 | CGGCGGAGGTGCGGCTTTGTGCGGCACAACGACCCGCGCCGAAAACCTTGCCGATTTGT    | 6743 |
| GCGS0834 | CGGCGGAGGTGCGGCTTTGTGCGGCACAACGACCCGCGCCGAAAACCTTGCCGATTTGT    | 6742 |
|          | *****                                                          |      |
| FA19     | ACAAGGCGCTCGGCGCGGATTGAAACGGGATACCCAAACCGGCAAATAA              | 6793 |
| GCGS0276 | ACAAGGCGCTCGGCGCGGATTGAAACGGGATACCCAAACCGGCAAATAA              | 6946 |
| CDC2     | ACAAGGCGCTCGGCGCGGATTGAAACGGGATACCCAAACCGGCAAATAA              | 6793 |
| GCGS0402 | ACAAGGCGCTCGGCGCGGATTGAAACGGGATACCCAAACCGGCAAATAA              | 6793 |
| GCGS0834 | ACAAGGCGCTCGGCGCGGACTGAAACGGGATACCCAAACCGGCAAATAA              | 6792 |
|          | *****                                                          |      |

**B.**

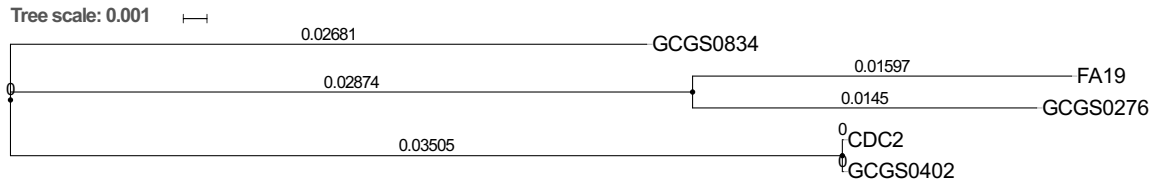

Supplement: mbo006184196sf1.pdf [file mbo006184196sf1.pdf]
