# Supplementary material
Source: PubMed Central journal article supplement (PMC6282211)
Supplement: mbo006184196st1.pdf [file mbo006184196st1.pdf]

## Supplemental Tables

**Table S1. Gonococcal clinical strains and *mtrD::kan* mutants used in this study**

| Strain designation             | LRRB <sup>1</sup> designation | SRA Accession # <sup>2</sup> | Azi   |
|--------------------------------|-------------------------------|------------------------------|-------|
| MIC (µg/ml)                    |                               |                              |       |
| CDC1                           | GS0001                        | SRR4416029                   | 2     |
| CDC1 <i>mtrD::kan</i>          |                               |                              | <0.03 |
| CDC2                           | GS0002                        | SRR4416030                   | 2     |
| CR.99 (CDC2 <i>mtrD::kan</i> ) |                               |                              | <0.03 |
| CDC5                           | GS0005                        | SRR4416060                   | 2     |
| CDC5 <i>mtrD::kan</i>          |                               |                              | <0.03 |
| CDC7                           | GS0007                        | SRR4416062                   | 2     |
| CDC7 <i>mtrD::kan</i>          |                               |                              | 0.06  |
| CDC13                          | GS0013                        | SRR4416033                   | 2     |
| CDC13 <i>mtrD::kan</i>         |                               |                              | 0.06  |
| CDC17                          | GS0017                        | SRR4416037                   | 2     |
| CDC17 <i>mtrD::kan</i>         |                               |                              | <0.03 |
| CDC27                          | GS0027                        | SRR4416048                   | 2     |
| CDC27 <i>mtrD::kan</i>         |                               |                              | <0.03 |
| CDC37                          | GS0037                        | SRR4416059                   | 2     |
| CDC37 <i>mtrD::kan</i>         |                               |                              | <0.03 |

<sup>1</sup>LRRB: Laboratory Reference and Research Branch

<sup>2</sup>SRA: Sequence read archive
