# Supplementary material
Source: PubMed Central journal article supplement (PMC6282211)
Supplement: mbo006184196st2.pdf [file mbo006184196st2.pdf]

**Table S2. Genetic derivatives used in this study**

| <b>Strain</b>         | <b>Genotype</b>                                                                                                   | <b>Source</b>               |
|-----------------------|-------------------------------------------------------------------------------------------------------------------|-----------------------------|
| FA19Str <sup>R</sup>  | point mutation in <i>rpsL</i>                                                                                     | Jerse, 2003                 |
| JF1                   | as FA19 with <i>mtrR</i> deleted                                                                                  | Hagman 1995                 |
|                       |                                                                                                                   | Folster 2005                |
| KH14                  | as FA19 but with <i>mtrD::kan</i>                                                                                 | Hagman 1997                 |
| KH15                  | as FA19 with 1 bp deletion in the<br><i>mtrR</i> promoter                                                         | Hagman 1995                 |
| CR.99                 | as CDC2 but with <i>mtrD::kan</i>                                                                                 | this study                  |
| CR.100                | as FA19Str <sup>R</sup> with <i>mtrR</i> gene from<br>CDC2 and <i>mtrC</i> and <i>mtrR</i> promoters<br>from CDC2 | this study                  |
| CR.101                | as FA19Str <sup>R</sup> with <i>mtrR/mtrC</i> intergenic<br>region from CDC2                                      | this study                  |
| CR.102                | as FA19Str <sup>R</sup> with D79N mutation<br>in MtrR                                                             | this study                  |
| CR.103                | as CR.100 with <i>mtrD</i> mutations<br>(positions 2196 to 3072) from CDC2                                        | this study                  |
| CR.104                | as CR.100 with K823E mutation in MtrD                                                                             | this study                  |
| FA19 <i>norM::kan</i> | as FA19 with <i>norM::kan</i>                                                                                     | Rouquette-<br>Loughlin 2003 |
| FA19 <i>macA::kan</i> | as FA19 with <i>macA::kan</i>                                                                                     | this study                  |
| CR102 pLES94,         | control plasmid                                                                                                   | this study                  |

|                |                                                            |            |
|----------------|------------------------------------------------------------|------------|
| CR102 pLES2.2  | with <i>pmtrC-lacZ</i> CDC2 promotor                       | this study |
| CR.102 pLES4.1 | with <i>pmtrC-lacZ</i> CDC2 promotor with<br>G to T change | this study |
