# Supplementary material
Source: PubMed Central journal article supplement (PMC6282211)
Supplement: mbo006184196st3.pdf [file mbo006184196st3.pdf]

**Table S3. Sequences of oligonucleotide primers**

| <b>Primer</b> | <b>Sequence</b>                                    | <b>Use</b>                             |
|---------------|----------------------------------------------------|----------------------------------------|
| macAF         | 5'-GGATGGTCTTATCTGAAGCC-3'                         | construction of CDC2 <i>macA::kan</i>  |
| macAR         | 5'-CATCAGCGTGGACTTGCCC-3'                          | construction of CDC2 <i>macA::kan</i>  |
| CEL1          | 3'-GACAATGTCATGCGATGATAGG-5'                       | construction of CR.100, CR.102         |
| KH9#12B       | 3'-CTCTTGTTTACTGATGGCATCG-5'                       | construction of CR.100                 |
| KH9#10B       | 5'-CCAAAACCGAAGCCTTGAAAACCAA-3'                    | construction of CR.102                 |
| mtrD11Rev     | 5'-CAGGCTGCATACGGGCATC-3'                          | construction of CR.103                 |
| mtrD3         | 5'-GGTTCATCGGTTTCGCTTCCC-3'                        | construction of CR.103                 |
| mtrD3Rev      | 5'-GGGAAGCGAACCGATGGAACC-3'                        | construction of CR.103                 |
| mtrD1         | 5'-CGGCATCTGAAGCCAAACCTGC-3'                       | construction of CR.103                 |
| mtrE12        | 5'-TGCGATGTCGATCAGCTTTTG-3'                        | construction of CR.103, CR.104         |
| mtrD10        | 5'-AGCATCAACCTGCAAGACCGC-3'                        | construction of CR.103, CR.104         |
| 16Smai_qRTF   | 5'-CCATCGGTATTCCTCCACATCTCT-3'                     | qRT-PCR of 16S                         |
| 16Smai_qRTR   | 5'-CGTAGGGTGCGAGCGTTAATC-3'                        | qRT-PCR of 16S                         |
| mtrEqPCR-F    | 5'-TGTCTGCCTGCACCATGATT-3'                         | qRT-PCR of <i>mtrE</i>                 |
| mtrEqPCR-R    | 5'-AGTGCGATGTCGATCAGCTT-3'                         | qRT-PCR of <i>mtrE</i>                 |
| mtrR_qRT_F    | 5'-CTTGTTTGACGCGTTGTTCCA-3'                        | qRT-PCR of <i>mtrR</i>                 |
| mtrR_qRT_R    | 5'-GTGGATGTCGTTGCTTTGCA-3'                         | qRT-PCR of <i>mtrR</i>                 |
| C2            | 5'-CGGGATCCCGTATAAAAAAGACTTT<br>GTATCCGTGTAATCG-3' | construction of pLES2.2                |
| C3PmtrC       | 5'-CGGGATCCCGAGCCATTATCTATCCT<br>ATCTG-3'          | construction of pLES2.2 and<br>pLES4.1 |
| C4            | 5'-CGGGATCCCGTATAAAAAAGACTTTT<br>TATCCGTGTAATCG-3' | construction of pLES4.1                |
| PEmtrC181     | 5'-CCTTAGAAGCATAAAAAAGCCTA-3'                      | PE of <i>mtrC</i>                      |
| CEL4          | 5'-GCAATCCCTTTGCGGTAAAAGG-3'                       | construction of CR.101                 |

|           |                                  |                        |
|-----------|----------------------------------|------------------------|
| mtrCpromR | 5'-GTAGCGGAATCTTCGTATTTTTTCGG-3' | construction of CR.101 |
| mtrD8     | 5'-GTCAGCGTGCAACTGCTGCG-3'       | qRT-PCR of <i>mtrD</i> |
| mtrD13    | 5'-GCCCGAAAAGCTGAAGCCGG-3'       | qRT-PCR of <i>mtrD</i> |
